# Supplementary material
Source: publisher site journal article supplement (http://kjim.org/upload/media/kjim-2019-198-suppl.pdf)
Supplement: Supplementary file 1 [file kjim-2019-198-suppl.pdf]

**Supplementary Table 1. Summary of frequency of clinically significant exacerbations in Korean patients from the DREAM and MENSA studies<sup>a</sup>**

| No. of exacerbations | DREAM           |                              |                               |                               | MENSA            |                               |                                |
|----------------------|-----------------|------------------------------|-------------------------------|-------------------------------|------------------|-------------------------------|--------------------------------|
|                      | Placebo (n = 6) | Mepolizumab 75 mg IV (n = 5) | Mepolizumab 250 mg IV (n = 7) | Mepolizumab 750 mg IV (n = 6) | Placebo (n = 15) | Mepolizumab 75 mg IV (n = 15) | Mepolizumab 100 mg SC (n = 15) |
| 0                    | 1 (17)          | 2 (40)                       | 3 (43)                        | 3 (50)                        | 6 (40)           | 8 (53)                        | 11 (73)                        |
| 1                    | 1 (17)          | 1 (20)                       | 1 (14)                        | 1 (17)                        | 3 (20)           | 5 (33)                        | 3 (20)                         |
| 2                    | 2 (33)          | 1 (20)                       | 2 (29)                        | 0                             | 1 (7)            | 1 (7)                         | 0                              |
| 3                    | 1 (17)          | 0                            | 1 (14)                        | 0                             | 1 (7)            | 0                             | 0                              |
| 4                    | 0               | 0                            | 0                             | 1 (17)                        | 2 (13)           | 0                             | 0                              |
| 5                    | 0               | 0                            | 0                             | 0                             | 0                | 0                             | 0                              |
| 6                    | 1 (17)          | 1 (20)                       | 0                             | 0                             | 2 (13)           | 1 (7)                         | 0                              |
| 7                    | 0               | 0                            | 0                             | 0                             | 0                | 0                             | 1 (7)                          |
| 8                    | 0               | 0                            | 0                             | 1 (17)                        | 0                | 0                             | 0                              |
| 9                    | 0               | 0                            | 0                             | 0                             | 0                | 0                             | 0                              |
| ≥ 10                 | 0               | 0                            | 0                             | 0                             | 0                | 0                             | 0                              |

Values are presented as number (%).

DREAM, Dose Ranging Efficacy And safety with Mepolizumab in severe asthma; MENSA, Mepolizumab as adjunctive therapy in patients with Severe Asthma; IV, intravenous; SC, subcutaneous.

<sup>a</sup>Total treatment period was 52 weeks (DREAM) and 32 weeks (MENSA).
